# Supplementary material for: Oleanolic Acid-Enriched Olive Oil Alleviates the Interleukin-6 Overproduction Induced by Postprandial Triglyceride-Rich Lipoproteins in THP-1 Macrophages
Source: MDPI journal article supplement (doi:10.3390/nu13103471), 2021-09-29
Supplement: s1 [file s1]

**Table S1.** Composition of the olive oil used in the study

| Component                              | Mean $\pm$ SD                    |
|----------------------------------------|----------------------------------|
| Fatty acids (%)                        |                                  |
| Palmitic (16:0)                        | 11.0 $\pm$ 0.4                   |
| Palmitoleic (16:1 n-7)                 | 1.0 $\pm$ 0.1                    |
| Stearic (18:0)                         | 3.2 $\pm$ 0.1                    |
| Oleic (18:1 n-9)                       | 75.7 $\pm$ 0.2                   |
| Linoleic (18:2, n-6)                   | 7.0 $\pm$ 0.0                    |
| $\alpha$ -linolenic (18:3 n-3)         | 0.3 $\pm$ 0.1                    |
| Arachidic (20:0)                       | 0.4 $\pm$ 0.0                    |
| Gadoleic (20:1 n-11)                   | 0.6 $\pm$ 0.1                    |
| Total phenolics ( $\mu$ g/g oil)       | 60.7 $\pm$ 0.8                   |
| Hydroxytyrosol and derivatives         | 21.9 $\pm$ 0.2                   |
| Tyrosol and derivatives                | 38.6 $\pm$ 0.3                   |
| Lignanes                               | 0.4 $\pm$ 0.0                    |
| Flavonoids                             | 0.3 $\pm$ 0.1                    |
| Simple phenols                         | 0.1 $\pm$ 0.0                    |
| Total sterols ( $\mu$ g/g oil)         | 1295.3 $\pm$ 3.9                 |
| $\beta$ -sitosterol                    | 1124.0 $\pm$ 1.9                 |
| $\delta$ 5-avenasterol                 | 46.5 $\pm$ 0.7                   |
| Campesterol                            | 44.0 $\pm$ 0.1                   |
| Stigmasterol                           | 11.7 $\pm$ 0.1                   |
| Clerosterol                            | 14.2 $\pm$ 0.0                   |
| $\delta$ 5,24-stigmastadienol          | 14.9 $\pm$ 0.7                   |
| $\delta$ 5,23-stigmastadienol          | 9.1 $\pm$ 0.0                    |
| Total tocopherols ( $\mu$ g/g oil)     | 263.8 $\pm$ 4.1                  |
| $\alpha$ -tocopherol                   | 230.6 $\pm$ 0.8                  |
| Triterpenoids ( $\mu$ g/g oil)         |                                  |
| Erythrodiol                            | 37.6 $\pm$ 0.1                   |
| Uvaol                                  | 3.6 $\pm$ 0.8                    |
| Oleanolic acid (control/enriched oils) | 3.8 $\pm$ 0.1 / 610.4 $\pm$ 16.2 |
| Maslinic acid                          | 4.8 $\pm$ 0.1                    |
| Total chlorophylls ( $\mu$ g/g oil)    | 1.1 $\pm$ 0.1                    |
| Total carotenoids ( $\mu$ g/g oil)     | 1.5 $\pm$ 0.1                    |

SD, Standard deviation

**Table S2.** Baseline anthropometric and biochemical characteristics of adolescents according to the olive oil ingested at breakfast.

| Variables                       | Olive oil<br>n = 11 | OA-enriched olive oil<br>n = 11 |
|---------------------------------|---------------------|---------------------------------|
| Gender (%)                      |                     |                                 |
| Boys                            | 2 (18.2)            | 3 (27.3)                        |
| Girls                           | 9 (81.8)            | 8 (72.7)                        |
| Mean age (years)                | 16.00 ± 0.00        | 16.18 ± 0.12                    |
| Body weight (kg)                | 57.26 ± 2.74        | 59.57 ± 2.42                    |
| BMI (kg/m <sup>2</sup> )        | 20.67 ± 0.87        | 21.10 ± 0.67                    |
| Body fat (%)                    | 21.43 ± 2.36        | 21.33 ± 2.18                    |
| WC (cm)                         | 68.55 ± 1.90        | 70.64 ± 2.08                    |
| SBP (mmHg)                      | 124.36 ± 3.16       | 122.91 ± 3.20                   |
| DBP (mmHg)                      | 76.73 ± 2.91        | 76.91 ± 2.05                    |
| TG (mg/dL)                      | 56.45 ± 4.81        | 58.82 ± 4.08                    |
| TC (mg/dL)                      | 172.10 ± 4.57       | 168.09 ± 5.81                   |
| LDL-c (mg/dL)                   | 115.36 ± 6.29       | 96.64 ± 8.59                    |
| HDL-c (mg/dL)                   | 45.18 ± 3.78        | 59.10 ± 6.88                    |
| Glucose (mg/dL)                 | 70.73 ± 1.59        | 72.64 ± 1.88                    |
| Insulin (μU/ml)                 | 7.27 ± 0.93         | 7.50 ± 1.65                     |
| HOMA-IR                         | 1.27 ± 0.17         | 1.32 ± 0.29                     |
| Pubertal stage (%) <sup>1</sup> |                     |                                 |
| Tanner stage 1/2                | 0 (0)               | 0 (0)                           |
| Tanner stage 3                  | 3 (27.3)            | 1 (9.1)                         |
| Tanner stage 4                  | 6 (54.5)            | 4 (36.4)                        |
| Tanner stage 5                  | 2 (18.2)            | 6 (54.5)                        |

Data are presented as mean ± SEM or %. Significant differences were not found. BMI, body mass index; WC, waist circumference; SBP, systolic blood pressure; DBP, diastolic blood pressure; TG, triglycerides; TC, total cholesterol; LDL, low-density lipoprotein cholesterol; HDL-c, high-density lipoprotein cholesterol; HOMA-IR, homeostatic model assessment of insulin resistance. <sup>1</sup>Based on self-reported Tanner stages.
